# Supplementary material
Source: MDPI journal article supplement (https://www.mdpi.com/2304-6740/11/3/110)
Supplement: s1 [file s1]

## Supporting information

### Development of Aldehyde Functionalized Iridium(III) Complexes Photosensitizers with Strong Visible-Light Absorption for Photocatalytic Hydrogen Generation from Water

Xiao Yao <sup>1</sup>, Qian Zhang <sup>1</sup>, Po-Yu Ho <sup>1,‡</sup>, Sze-Chun Yiu <sup>1</sup>, Songwut Suramitr <sup>2</sup>, Supa Hannongbua <sup>2,\*</sup>, Cheuk-Lam Ho <sup>2\*</sup>

<sup>1</sup> X. Yao, Q. Zhang, Dr. P.-Y. Ho, Dr. S.-C. Yiu, Dr. C.-L. Ho  
Department of Applied Biology and Chemical Technology,  
The Hong Kong Polytechnic University  
Hung Hom, Hong Kong, (P.R. China);  
PolyU Shenzhen Research Institute, Shenzhen, (P. R. China).  
E-mail: cheuk-lam.ho@polyu.edu.hk

<sup>2</sup> Dr. S. Suramitr, Prof. S. Hannongbua  
Department of Chemistry,  
Faculty of Science, Kasetsart University,  
Bangkok, 10990, Thailand;  
Center for Advanced Studies in Nanotechnology for Chemical,  
Food and Agricultural Industries, KU Institute for Advanced Studies,  
Kasetsart University, Bangkok 10900, Thailand.

<sup>‡</sup>Present address: (1) Biological Inorganic Chemistry Laboratory, The Francis Crick Institute, 1 Midland Road, London NW1 1AT, United Kingdom; (2) Department of Chemistry, King's College London, Britannia House, 7 Trinity Street, London SE1 1DB, United Kingdom

Xiao Yao: 0000-0002-0085-4861  
Qian Zhang: 0000-0002-9743-4213  
Po-Yu Ho: 0000-0002-2543-9541  
Sze-Chun Yiu: 0000-0002-3001-365X  
Songwut Suramitr: 0000-0002-6941-8814  
Supa Hannongbua: 0000-0002-9901-4466  
Cheuk-Lam Ho: 0000-0001-8596-0307

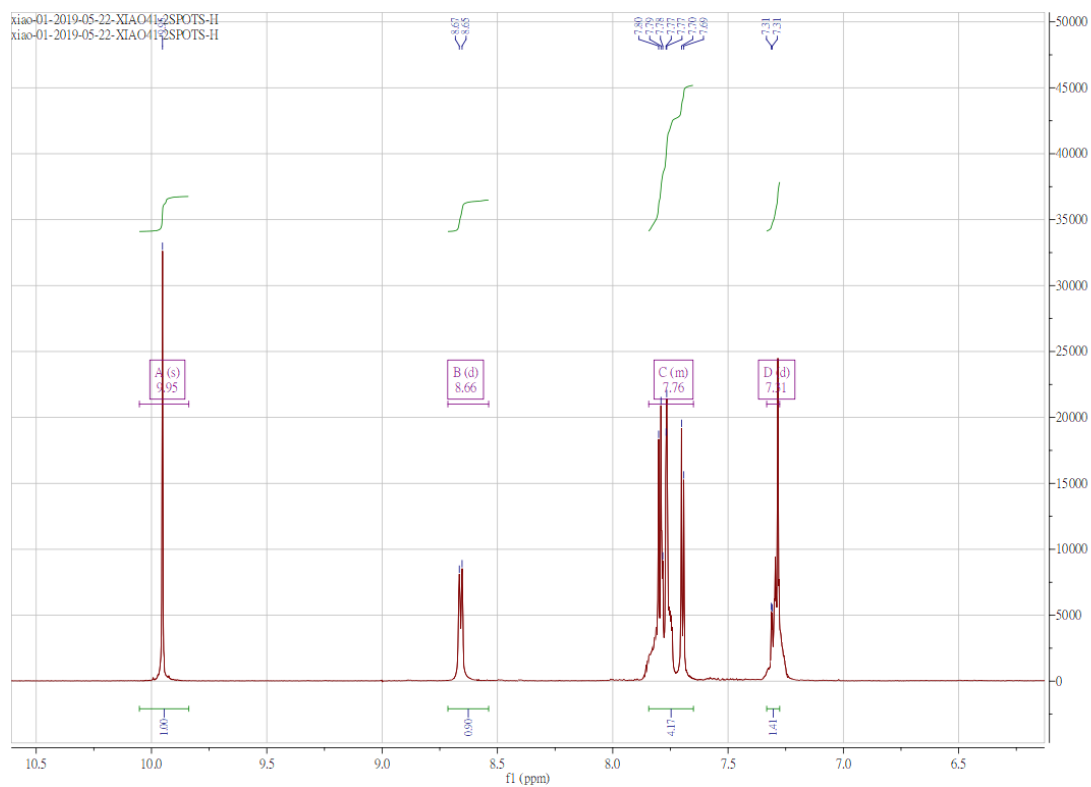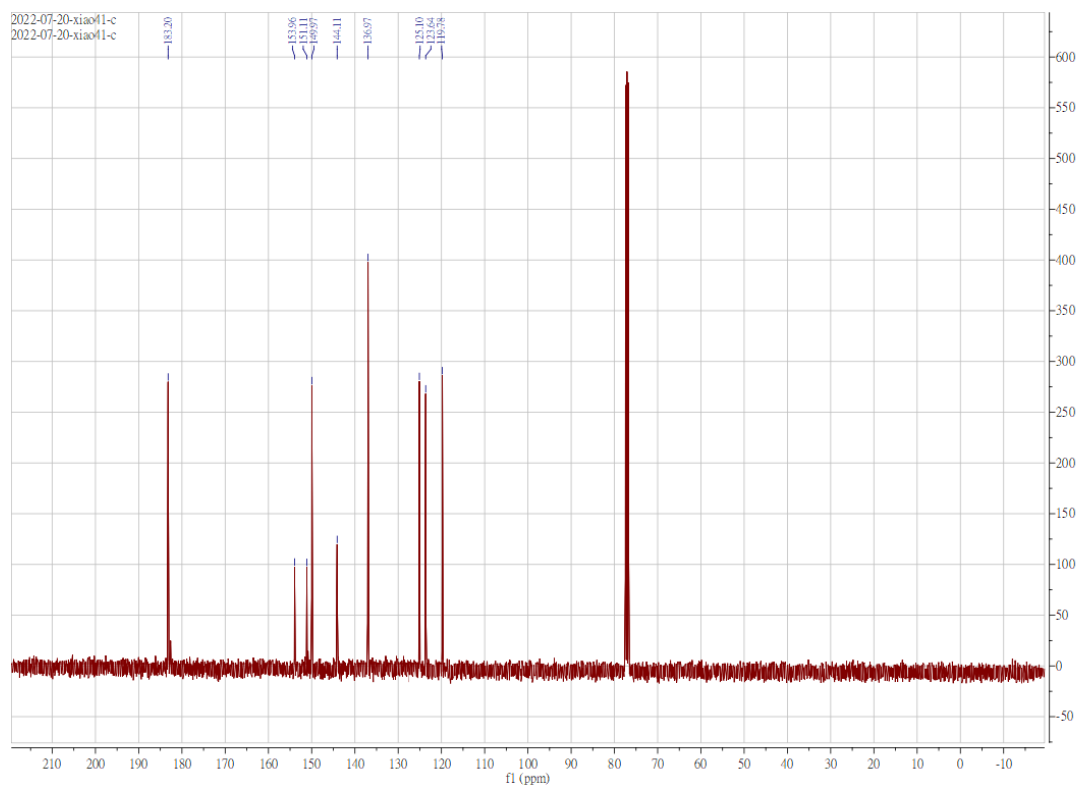



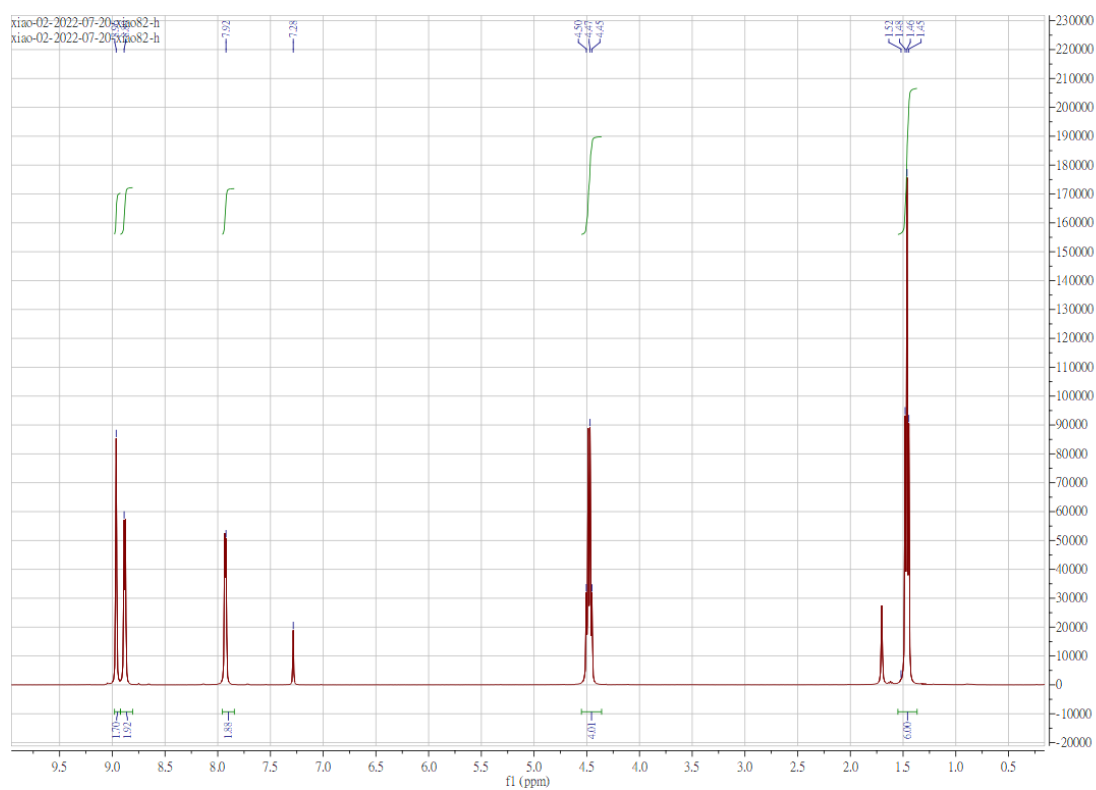

**Figure S5.** <sup>1</sup>H NMR spectrum of diethyl [2,2'-bipyridine]-4,4'-dicarboxylate in CDCl<sub>3</sub>

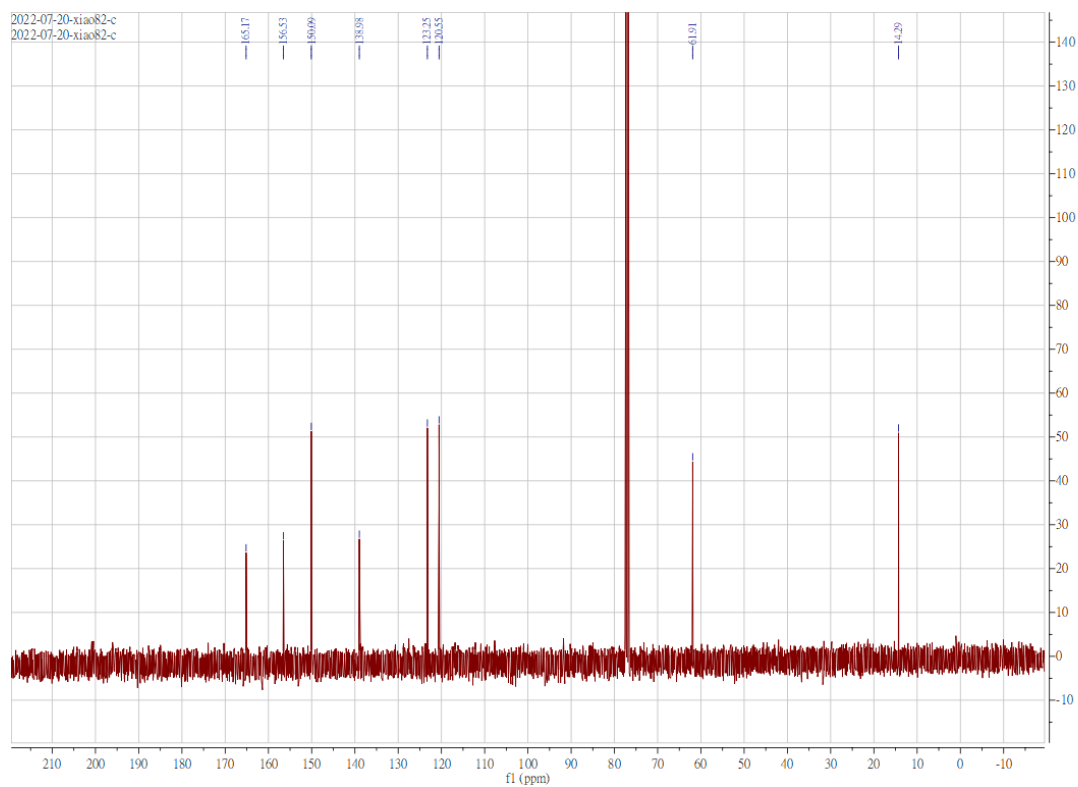

**Figure S6.** <sup>13</sup>C NMR spectrum of diethyl [2,2'-bipyridine]-4,4'-dicarboxylate in CDCl<sub>3</sub>

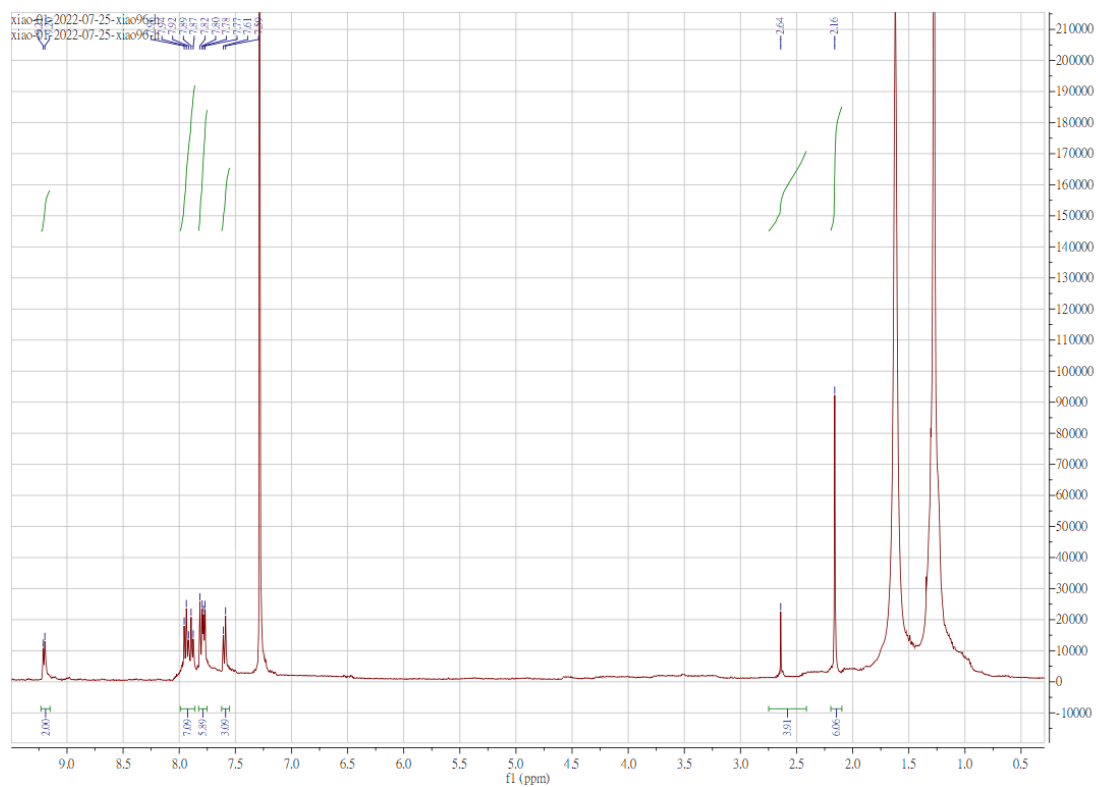

**Figure S7.**  $^1\text{H}$  NMR spectrum of Ir1 in  $\text{CDCl}_3$

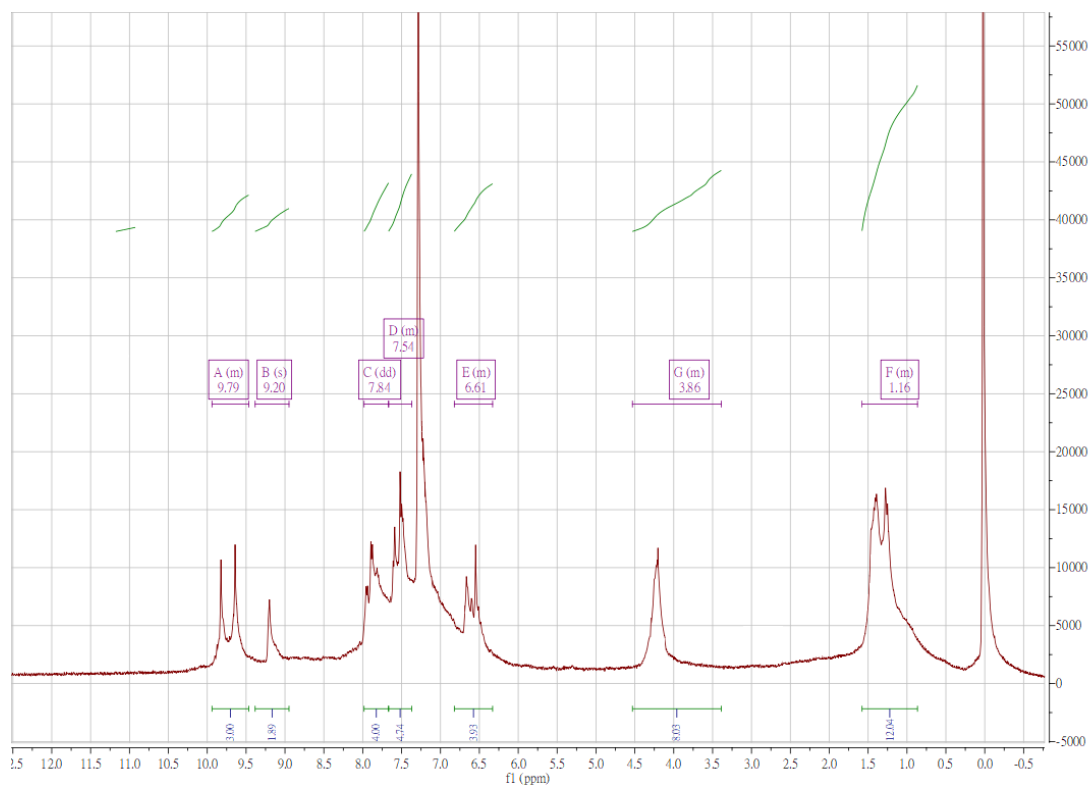

**Figure S8.**  $^1\text{H}$  NMR spectrum of Ir2 in  $\text{CDCl}_3$

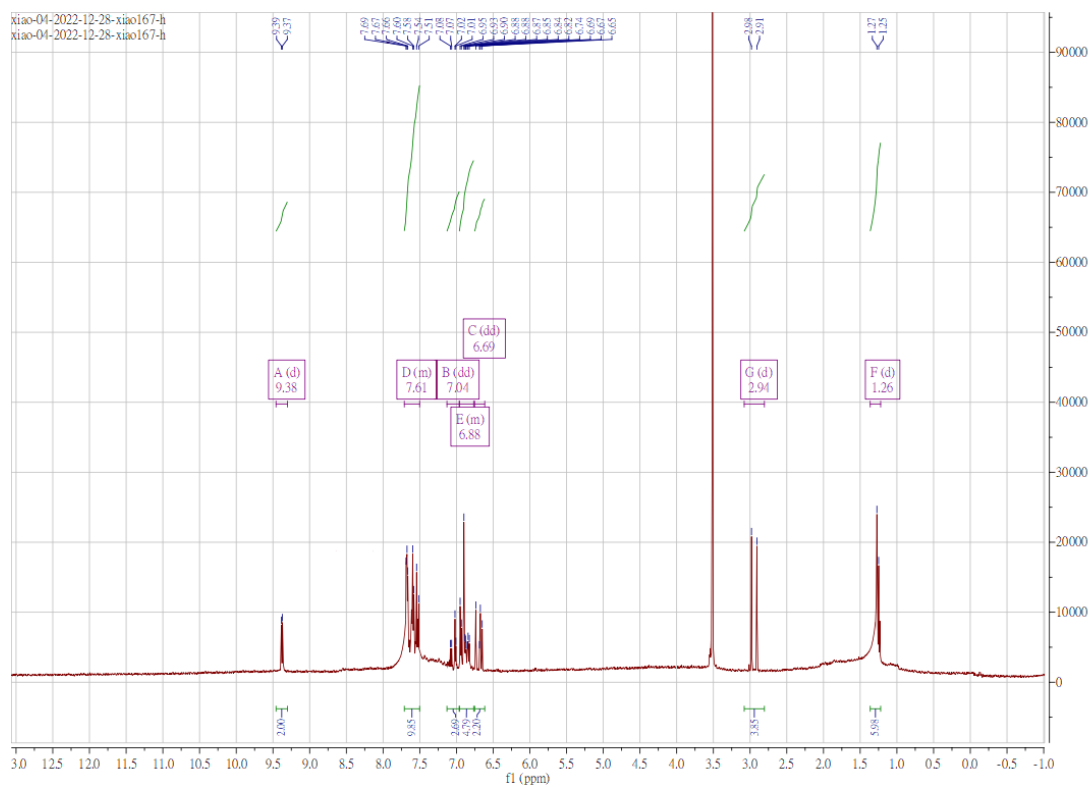

**Figure S9.**  $^1\text{H}$  NMR spectrum of Ir3 in  $\text{CDCl}_3$

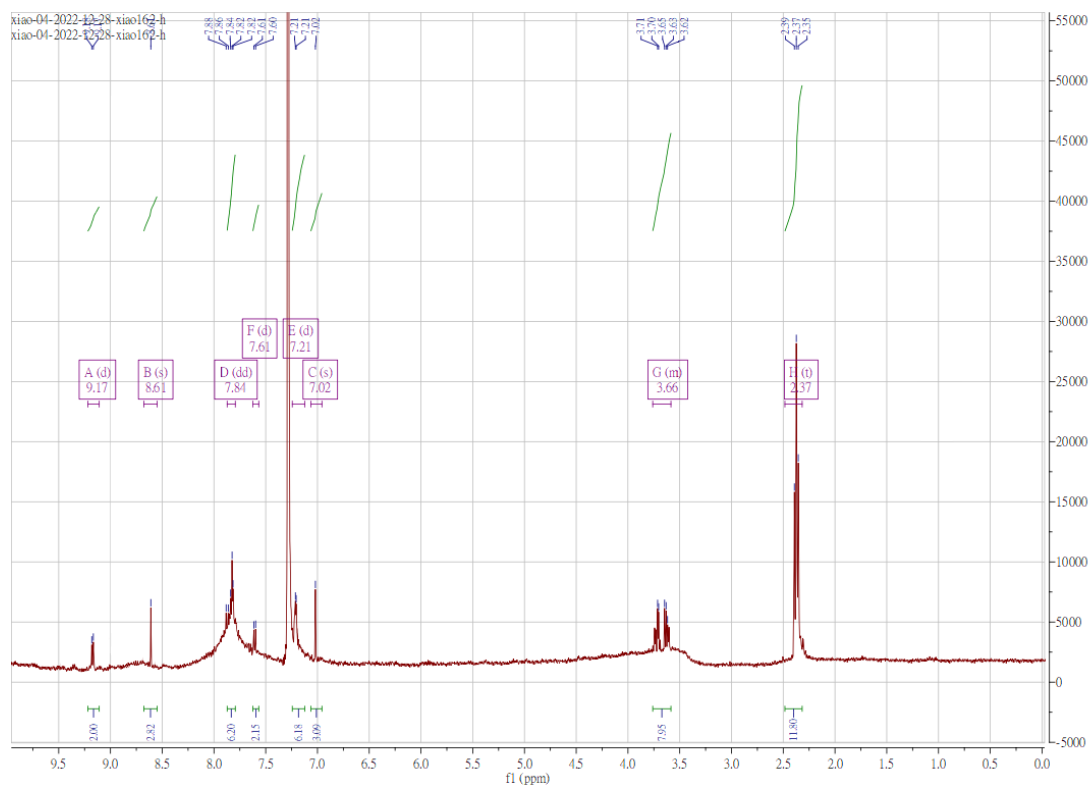

**Figure S10.**  $^1\text{H}$  NMR spectrum of Ir4 in  $\text{CDCl}_3$

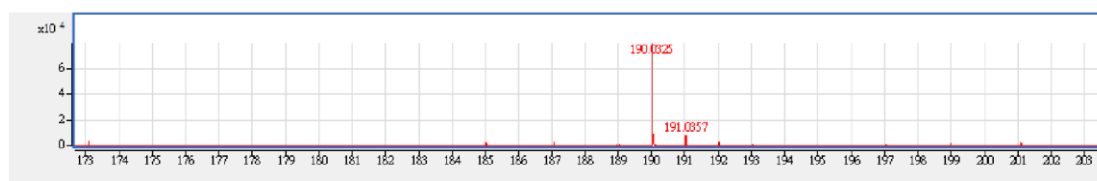

**Figure S11.** MS result of L1

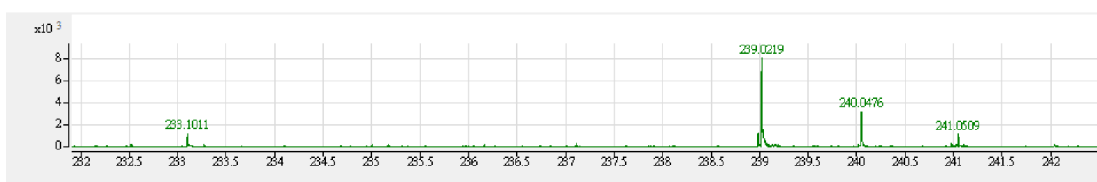

**Figure S12.** MS result of L2

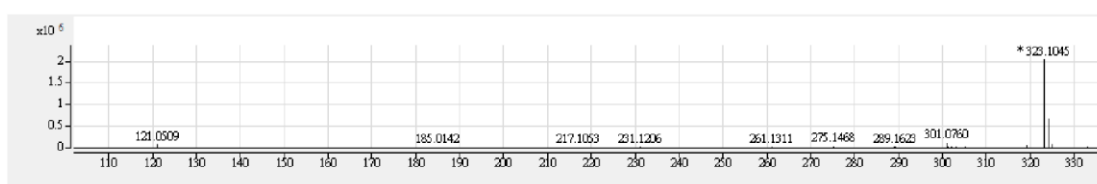

**Figure S13.** MS result of diethyl [2,2'-bipyridine]-4,4'-dicarboxylate

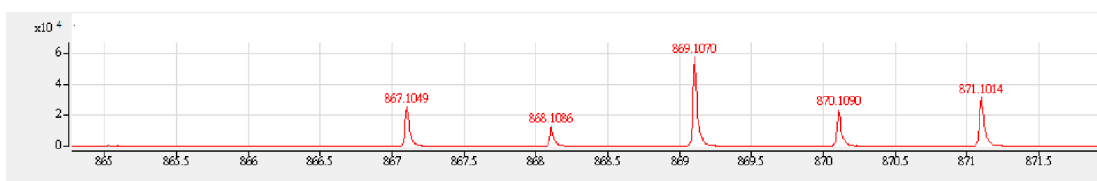

**Figure S13.** MS result of Ir1

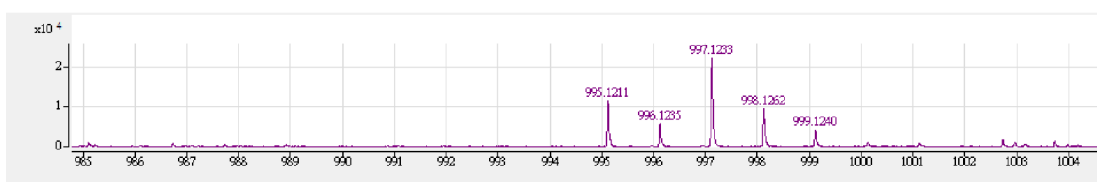

**Figure S14.** MS result of Ir2

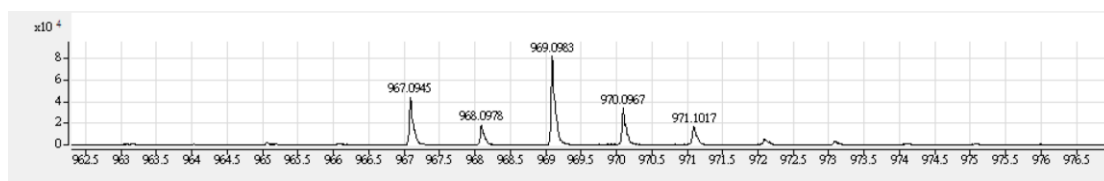

**Figure S15.** MS result of Ir<sub>3</sub>

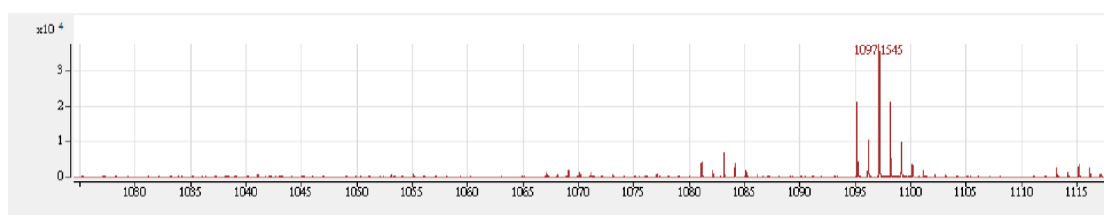

**Figure S16.** MS result of Ir<sub>4</sub>

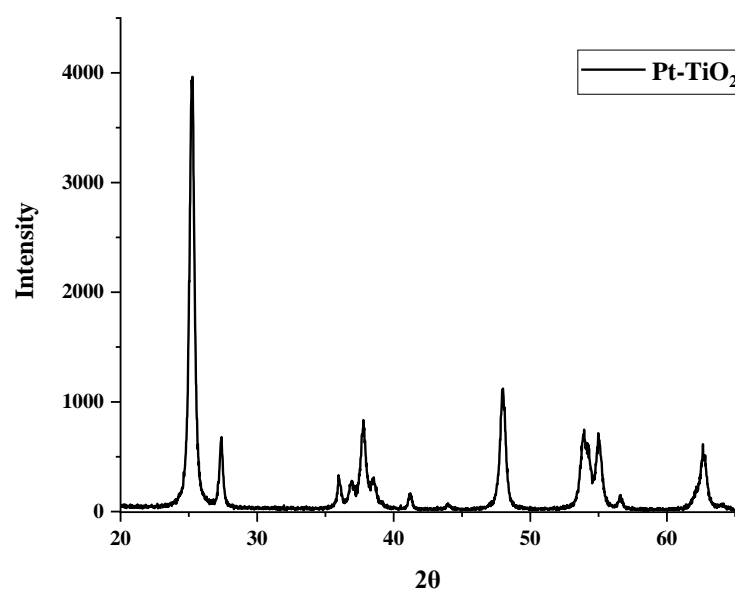

**Figure S17.** XRD patterns of Pt-TiO<sub>2</sub>



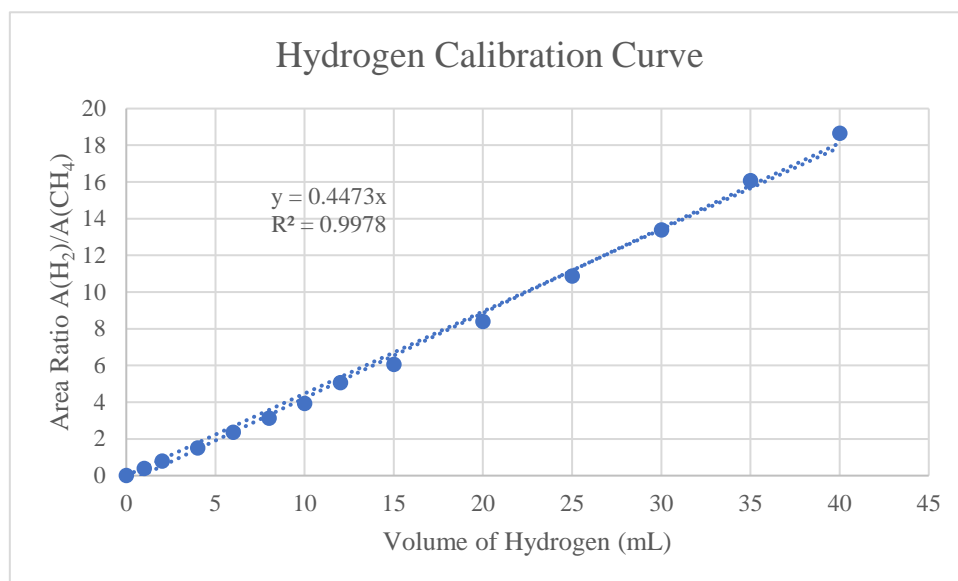

**Figure S18.** Calibration plot of the signal ratio ( $H_2/CH_4$ ) vs. amount of  $H_2$  obtained from GC analysis.

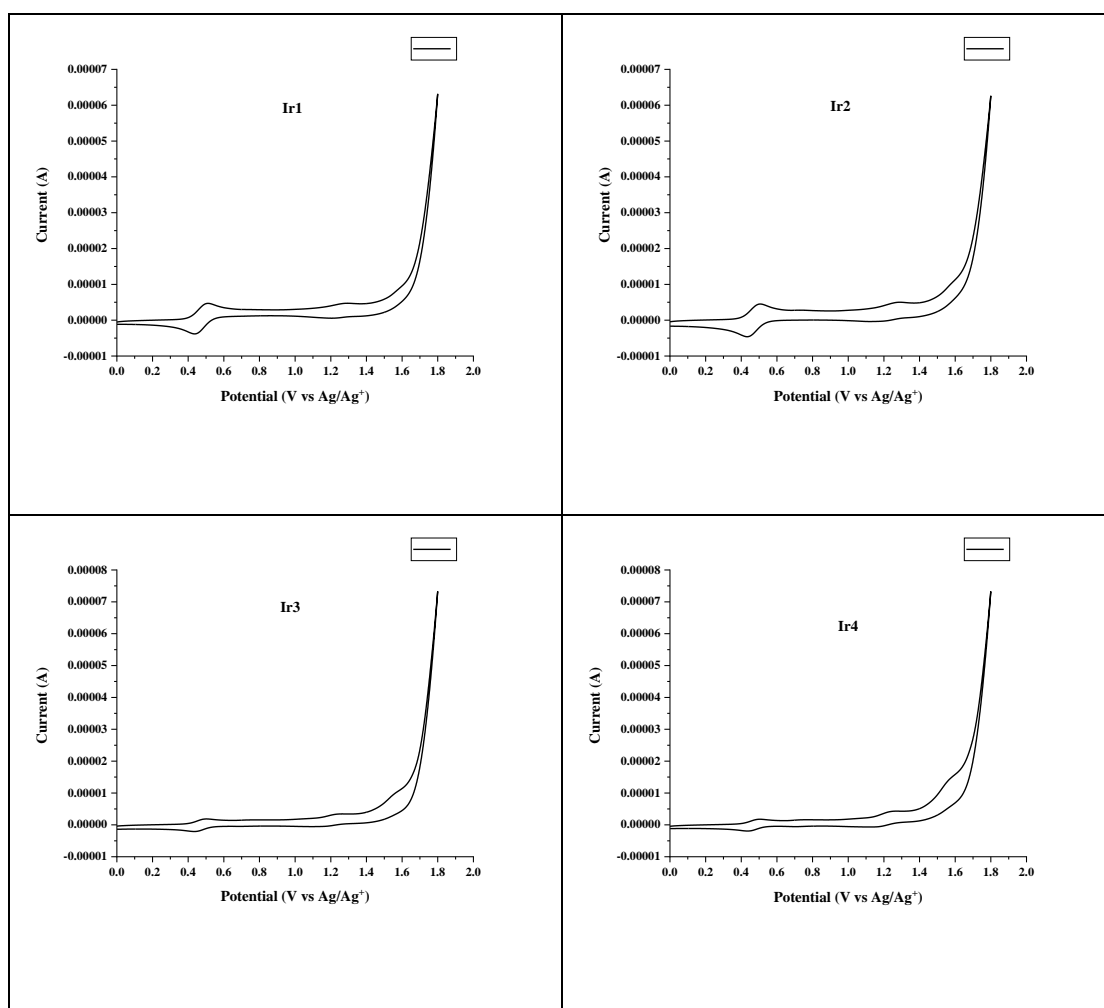

**Figure S19.** Cyclic voltammograms of Ir1–Ir4.

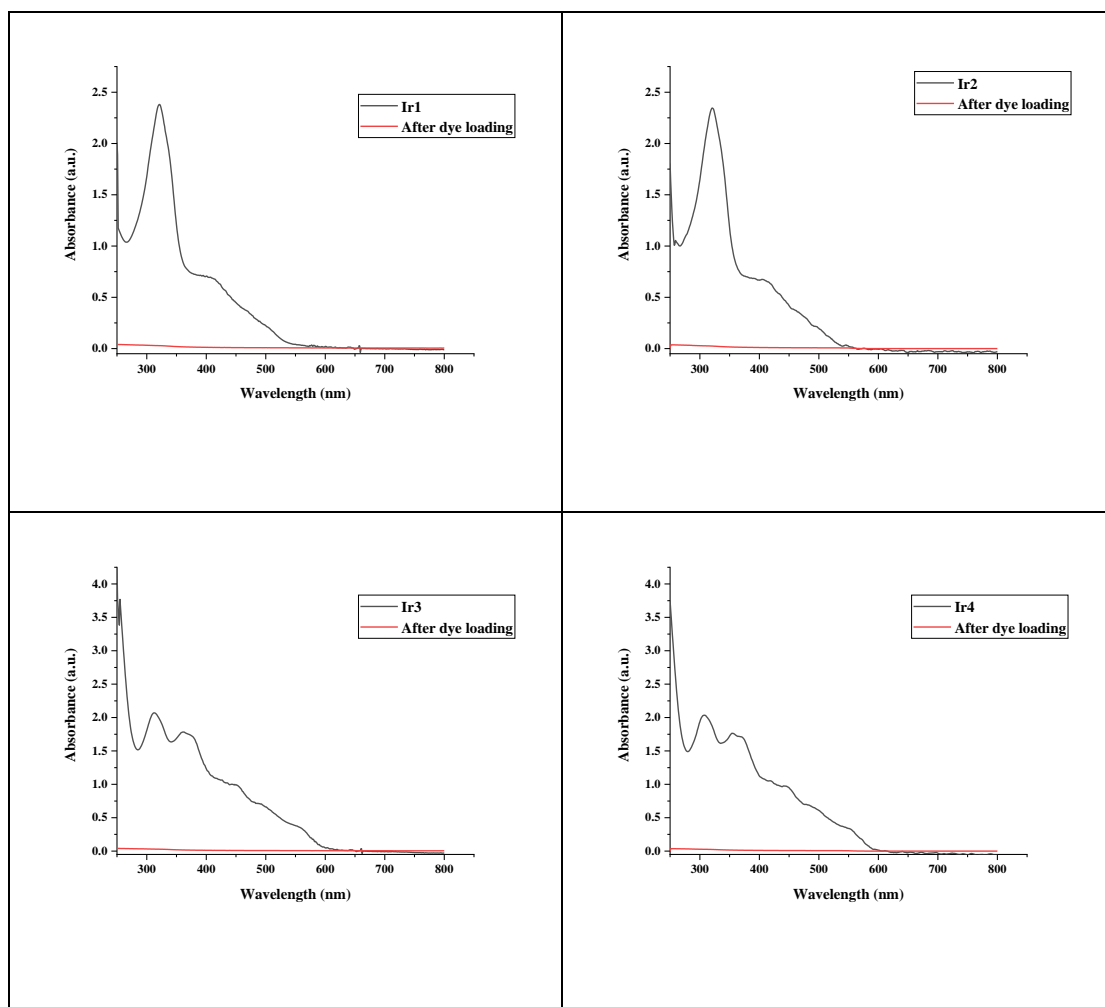

**Figure S20.** UV/Vis absorption spectra of **Ir1** to **Ir4** before and after dye loading in  $\text{CH}_2\text{Cl}_2$  solution at 293 K

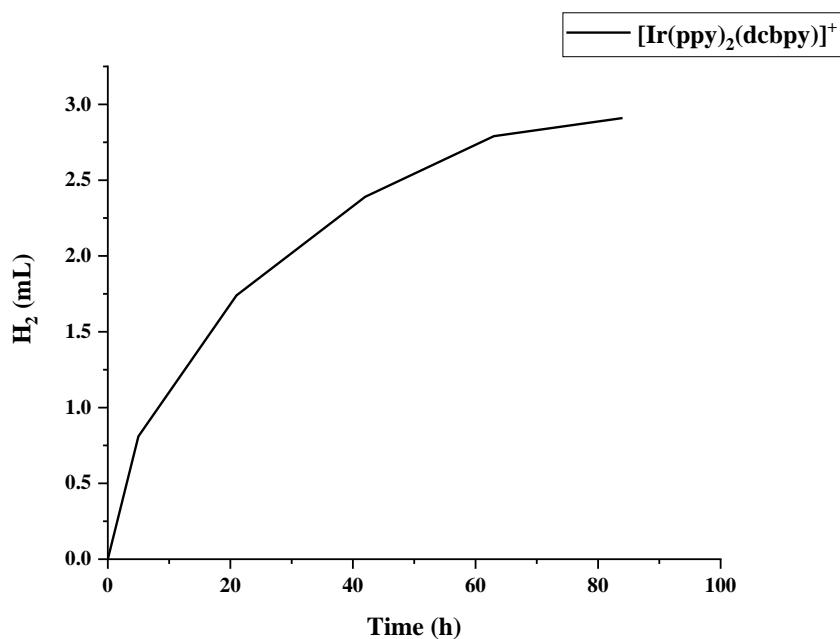

**Figure S21.** Photocatalytic H<sub>2</sub> generation curves of **[Ir(ppy)<sub>2</sub>(dcbpy)]<sup>+</sup>** under blue LED irradiation (50 mW).

**Table S1.** Photocatalytic H<sub>2</sub> generation data with **[Ir(ppy)<sub>2</sub>(dcbpy)]<sup>+</sup>** under blue light irradiation.

| Dye                                             | Time<br>/h | H <sub>2</sub><br>/mL | TON <sup>[a]</sup> | TOF <sup>[b]</sup><br>/h <sup>-1</sup> | TOF <sub>i</sub> <sup>[c]</sup><br>/h <sup>-1</sup> | Activity <sub>i</sub> <sup>[d]</sup><br>/μmol g <sup>-1</sup><br>h <sup>-1</sup> | AQY <sub>i</sub> % <sup>[e]</sup> |
|-------------------------------------------------|------------|-----------------------|--------------------|----------------------------------------|-----------------------------------------------------|----------------------------------------------------------------------------------|-----------------------------------|
| <b>[Ir(ppy)<sub>2</sub>(dcbpy)]<sup>+</sup></b> | 84         | 2.91                  | 1900               | 22.6                                   | 105.8                                               | 66122                                                                            | 0.42                              |

[a] Turnover number (TON) of H<sub>2</sub> was calculated as twice of the number of moles of H<sub>2</sub> produced over the number of moles of PS attached to platinized TiO<sub>2</sub>. [b] Turnover frequency (TOF) was calculated per hour. [c] Initial turnover frequency (TOF<sub>i</sub>) in the first 5 h. [d] Initial photocatalytic activity (Activity<sub>i</sub>) is defined as the number of micromoles of H<sub>2</sub> evolved per gram of platinum loaded per hour. [e] Initial apparent quantum yield percentage (AQY<sub>i</sub>).

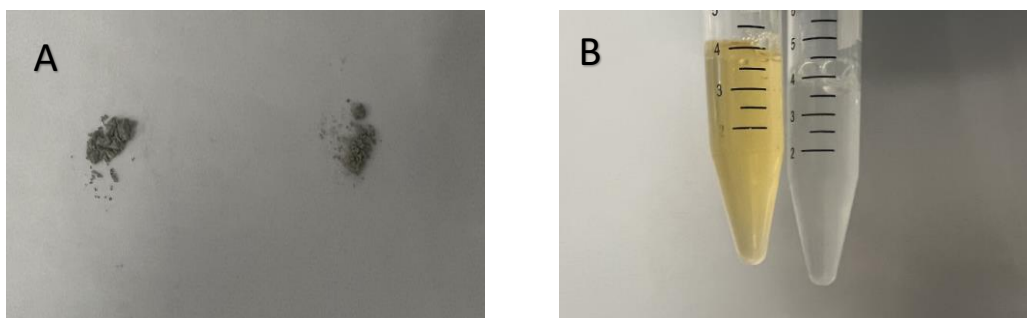

**Figure S22.** (A) TiO<sub>2</sub> composite material with **Ir4** before (left) and after (right) irradiation. (B) AA aqueous solution before (right) and after (left) irradiation.
